# Supplementary material
Source: publisher figshare collection journal article supplement (https://sage.figshare.com/ndownloader/files/24154513)
Supplement: Supplementary file 1 [file 24154513]

Supplementary figure 1

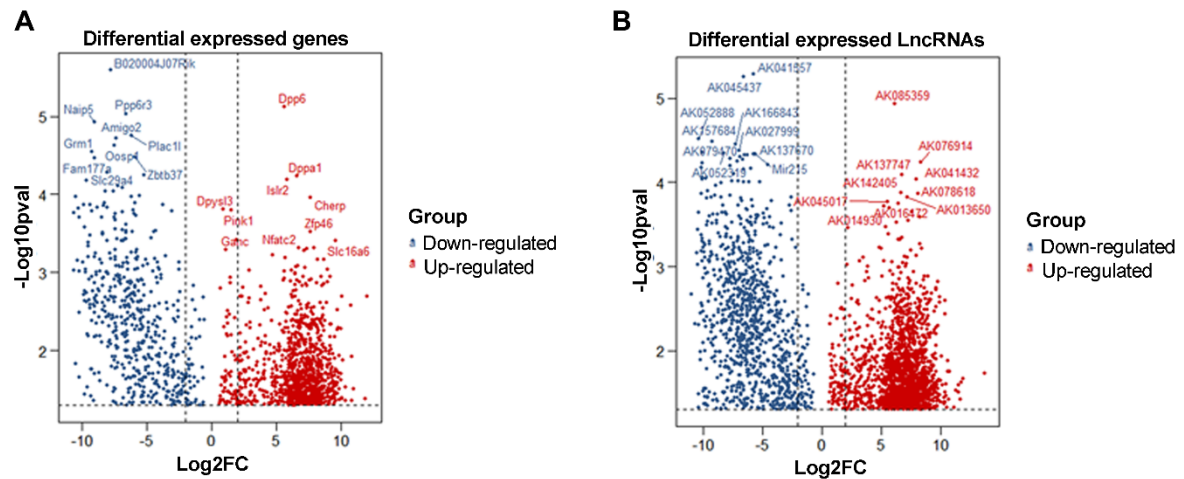

Supplementary figure 1. The differentially expressed lncRNAs (A) and mRNAs (B) are shown in volcano plot ( $p < 0.05$ ,  $\text{Log}_2\text{FC} > 1$ ), top 10 down-regulated or up-regulated genes are also labeled.

Supplementary figure2

```

1 AGCTGCCTGG CAAGCACACC TGATTCTTAC AGGAAGTTCT ATGCACTAAG TTTTCACTT
61 AATGCTATAA AGAGCATTCC CTCCAAGCTG GGTGTGGCAC CGAATGCCTT TAATTCCAAC
121 ACTCACGAGG CAGTGGCAGG CAGATCTCTG TGCTCTAAGA CAGCCTGGTC TAAGACCTTG
181 CCTCAAAAAA AAAAAAAAAA AAAAAAAAAA AAAAAAGATG AAAAAACAAA AACCCCGGAT
241 TTCTGAGTTC GAGGTCAGCC TGGTCTACAG AGTGAGTTCC AGGATGGCCA GGCTACACAG
301 AGAAACCCCTG TCTG

```

Supplementary figure 2. The sequence of lncRNA-AK028245.
